Development 138, 2631 (2011) doi:10.1242/dev.069096  
© 2011. Published by The Company of Biologists Ltd

## The nucleoporin Seh1 forms a complex with Mio and serves an essential tissue-specific function in *Drosophila* oogenesis

**Stefania Senger, John Csokmay, Tanveer Akbar, Takako Iida Jones, Prabuddha Sengupta and Mary A. Lilly**

There was an error published in *Development* **138**, 2133-2142.

In the online version of the article published on 26th April 2011, Dr Tanveer Akbar's name appeared in reverse order (full text) or with an inappropriate comma (PDF).

The correct author list appears above. The printed version is correct.

We apologise to the authors and readers for this mistake.
